# Supplementary material for: Real World Estimate of Vaccination Protection in Individuals Hospitalized for COVID-19
Source: MDPI journal article supplement (doi:10.3390/vaccines10040550), 2022-04-01
Supplement: s1 [file s1]

## Supplementary Material

**Supplementary Table S1.** Relative hazards of in hospital death (primary endpoint) from fitting a standard Cox regression model, unadjusted and adjusted for age, ethnicity, month of enrolment and immunocompetence.

| Unadjusted and adjusted relative hazards of in hospital death |                        |         |                        |         |
|---------------------------------------------------------------|------------------------|---------|------------------------|---------|
|                                                               | Unadjusted HR (95% CI) | p-value | Adjusted * HR (95% CI) | p-value |
| <i>Unvaccinated</i>                                           | 1                      |         | 1                      |         |
| <i>One dose</i>                                               | 1.25 (0.76, 2.03)      | 0.377   | 0.96 (0.59, 1.58)      | 0.886   |
| <i>2+ doses</i>                                               | 0.96 (0.65, 1.40)      | 0.825   | 0.48 (0.29, 0.82)      | 0.007   |

\* adjusted for age, ethnicity, immunocompetence and month of enrolment.

**Supplementary Table S2.** Relative hazards of in hospital death (primary endpoint) from fitting a standard Cox regression model including only patients with at least two-doses with months from second dose to hospital admission as exposure.

| Unadjusted and adjusted relative hazards of in hospital death |                        |         |                        |         |
|---------------------------------------------------------------|------------------------|---------|------------------------|---------|
|                                                               | Unadjusted HR (95% CI) | p-value | Adjusted * HR (95% CI) | p-value |
|                                                               | 1                      |         | 1                      |         |
| <b>Time elapsed from second dose per month longer</b>         | 1.15 (0.89, 1.47)      | 0.283   | 0.88 (0.56, 1.38)      | 0.572   |

\* adjusted for age, ethnicity, age-unadjusted CCI and month of enrolment.

**Supplementary Table S3.** Unadjusted and adjusted HR of death from fitting a standard Cox regression model - including only those who initiated cycle with BNT162b2.

| Unadjusted and adjusted relative hazards of in hospital death -subset of those initiating vaccine cycle with BNT162b2 |                        |         |                        |         |
|-----------------------------------------------------------------------------------------------------------------------|------------------------|---------|------------------------|---------|
|                                                                                                                       | Unadjusted HR (95% CI) | p-value | Adjusted * HR (95% CI) | p-value |
| <i>Unvaccinated</i>                                                                                                   | 1                      |         | 1                      |         |
| <i>One dose</i>                                                                                                       | 2.05 (1.22, 3.43)      | 0.006   | 1.50 (0.89, 2.53)      | 0.128   |
| <i>2+ doses</i>                                                                                                       | 1.12 (0.75, 1.69)      | 0.578   | 0.53 (0.31, 0.90)      | 0.020   |

\* adjusted for age, ethnicity, age-unadjusted CCI and month of enrolment.

**Supplementary Table S4.** Unadjusted and adjusted HR of death from fitting a standard Cox regression model - primary endpoint sensitivity analysis restricted to those with PaO<sub>2</sub>/FiO<sub>2</sub> less than 300 mm/hg.

| Unadjusted and adjusted relative hazards of in hospital death -subset of those with PaO <sub>2</sub> /FiO <sub>2</sub> ≤ 300 mm/hg |                        |         |                        |         |
|------------------------------------------------------------------------------------------------------------------------------------|------------------------|---------|------------------------|---------|
|                                                                                                                                    | Unadjusted HR (95% CI) | p-value | Adjusted * HR (95% CI) | p-value |
| <i>Unvaccinated</i>                                                                                                                | 1                      |         | 1                      |         |
| <i>One dose</i>                                                                                                                    | 1.37 (0.72, 2.61)      | 0.344   | 1.16 (0.60, 2.26)      | 0.659   |
| <i>2+ doses</i>                                                                                                                    | 1.01 (0.63, 1.61)      | 0.969   | 0.57 (0.31, 1.07)      | 0.081   |

\* adjusted for age, ethnicity, age-unadjusted CCI and month of enrolment.

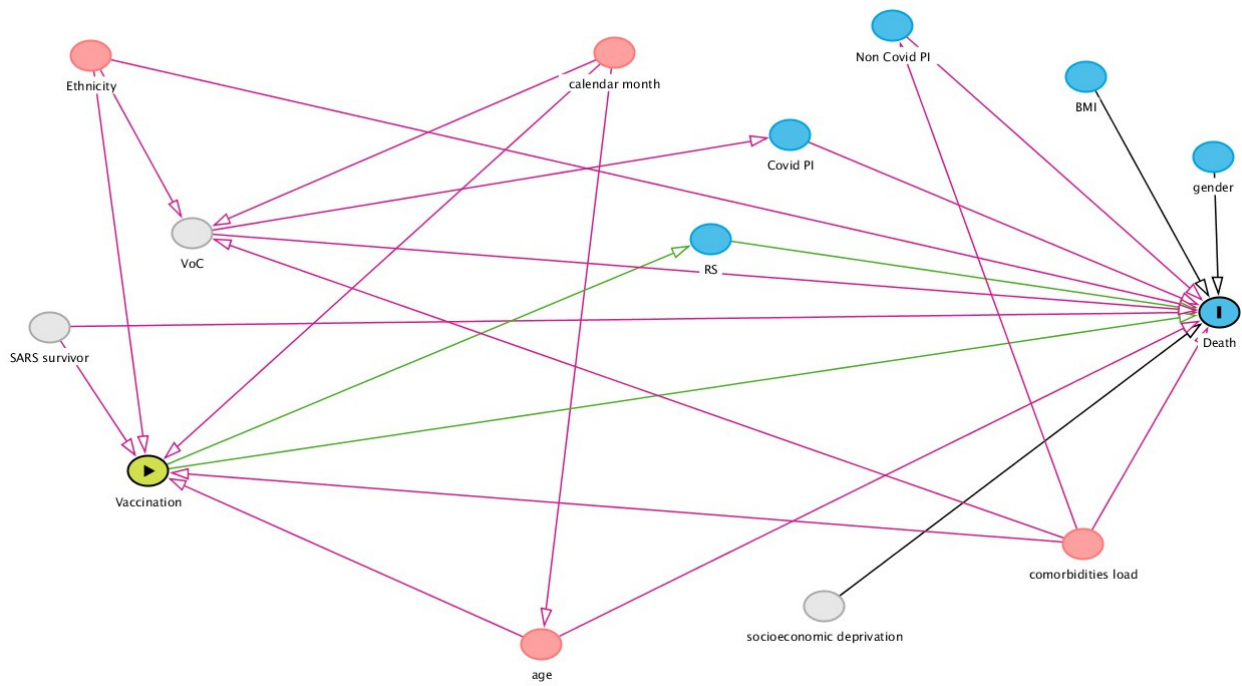

**Supplementary Figure S1.** Underlying assumptions regarding the causal links between variables.
